# Supplementary material for: The local atomic distribution in tetragonal PZT
Source: Royal Society of Chemistry journal article supplement (doi:10.1039/d4cp03354j), 2024-01-01
Supplement: d4cp03354j1.pdf [file d4cp03354j1.pdf]

## The local atomic distribution in tetragonal PZT

Junyu Niu <sup>a</sup>, Chong Li <sup>b</sup>, Zengzhe Xi <sup>a, \*</sup>

<sup>a</sup> Xi'an Structure-Function Materials International Science and technology Cooperation Base, School of Materials and Chemical Engineering, Xi'an Technological University, Xi'an 710021, Shaanxi, China

<sup>b</sup> Shenzhen Key Laboratory of Advanced Thin Films and Applications, Key Laboratory of Optoelectronic Devices and Systems of Ministry of Education and Guangdong Province, College of Physics and Optoelectronic Engineering, Shenzhen University, Shenzhen 518060, P. R. China

\* Corresponding author, E-mail: zzhxi@xatu.edu.cn

### Supplemental Material

**TableS1.** The lattice parameter a and c, lattice volume, band gap, the softest frequency in gamma point and the zero point energy of supercells.

| super cells | a/Å    | c/Å    | V/Å <sup>3</sup> | band gap/eV | softest frequency/cm <sup>-1</sup> | zero point energy/eV |
|-------------|--------|--------|------------------|-------------|------------------------------------|----------------------|
| 1           | 8.9396 | 8.3886 | 670.39           | 2.13216     | 0.918367                           | 0.120989             |
| 2           | 9.6243 | 8.7871 | 813.92           | 2.18502     | -0.642857                          | 0.121929             |
| 3           | 8.3509 | 7.3330 | 511.39           | 2.29956     | -0.642857                          | 0.122876             |
| 4           | 8.3510 | 7.6531 | 533.72           | 2.22907     | 1.43878                            | 0.123854             |
| 5           | 8.2788 | 7.7128 | 528.62           | 2.34361     | 0.918367                           | 0.121862             |
| 6           | 8.1780 | 7.1691 | 479.47           | 2.31718     | -0.642857                          | 0.123801             |
| 7           | 8.9396 | 8.0038 | 639.64           | 2.2467      | 0.397959                           | 0.122795             |
| 8           | 8.3510 | 7.5434 | 526.07           | 2.39648     | 0.918367                           | 0.120805             |
| 9           | 9.5922 | 8.1145 | 746.62           | 2.39648     | 0.918367                           | 0.123715             |
| 10          | 9.5598 | 8.1685 | 746.51           | 2.45815     | -1.16327                           | 0.127653             |
| 11          | 8.2788 | 6.8542 | 469.78           | 2.37004     | -0.642857                          | 0.127625             |
| 12          | 9.5922 | 7.6170 | 700.85           | 2.48458     | -1.16327                           | 0.135501             |
| 13          | 9.5598 | 7.6512 | 699.24           | 2.46696     | -2.20408                           | 0.134487             |
| 14          | 9.6243 | 7.4559 | 690.61           | 2.44934     | -2.72449                           | 0.136449             |
| 15          | 9.6243 | 8.4369 | 781.48           | 2.36123     | -4.28571                           | 0.134434             |
| 16          | 8.2788 | 7.0264 | 481.58           | 2.3348      | -3.76531                           | 0.138361             |
| 17          | 8.2788 | 6.8542 | 469.78           | 2.35242     | -6.36735                           | 0.14823              |
| 18          | 8.9396 | 7.8368 | 626.29           | 2.21145     | -16.2551                           | 0.158082             |
| 19          | 8.3509 | 7.0875 | 494.27           | 2.2467      | -14.6939                           | 0.154091             |
| 20          | 9.6243 | 8.2661 | 765.66           | 2.22907     | -22.5                              | 0.163951             |
| 21          | 8.3509 | 6.9471 | 484.47           | 1.97357     | -18.8571                           | 0.189617             |
| 22          | 8.1780 | 6.7159 | 449.16           | 1.77974     | -27.1837                           | 0.266719             |

The program of crystal generation and statistics:

```

import random
import datetime
#include <iostream>
#include <fstream>
#include <string>
#include <ctime>
#include <vector>
#include <unordered_map>
#include <stdio.h>
#include <stdlib.h>
#include <time.h>

#Defined variable
mx = random.randint(0, 20)
my = random.randint(0, 20)
mz = random.randint(0, 2)

#Generate a crystal structure file
output = "filename
_audit_creation_date          2024-02-09
_audit_creation_method        'NJY XATU TRI MCMD'
_symmetry_space_group_name_H-M  'P4mm'
_symmetry_Int_Tables_number    1
_symmetry_cell_setting         triclinic
loop_
_symmetry_equiv_pos_as_xyz
  x,y,z
_cell_length_a                 80.920
_cell_length_b                 80.920
_cell_length_c                 8.2788
_cell_angle_alpha              90.0000
_cell_angle_beta               90.0000
_cell_angle_gamma              90.0000
loop_
_atom_site_label
_atom_site_type_symbol
_atom_site_fract_x
_atom_site_fract_y
_atom_site_fract_z
_atom_site_U_iso_or_equiv
_atom_site_adp_type
_atom_site_occupancy\n"
for mn in range(800):
    atomunit = random.choice(["Zr", "Ti"])

```

```

    output += f"atomunit{mn*5+1}      {atomunit}      {0.5*mx+0.25}      {0.5*my+0.5}
{0.5*mz+0.45170}      uiso      1.00\n"
    output += f"Omn{mn*5+2}      o      {0.5*mx+0.25}      {0.5*my+0.5}      {0.5*mz+0.89730}
uiso      1.00\n"
    output += f"Pbmn{mn*5+3}      o      {0.5*mx}      {0.5*my}      {0.5*mz}      uiso      1.00\n"
    output += f"Omn{mn*5+4}      o      {0.5*mx+0.25}      {0.5*my}      {0.5*mz+0.37850}
uiso      1.00\n"
    output += f"Omn{mn*5+5}      o      {0.5*mx}      {0.5*my+0.5}      {0.5*mz+0.37850}
uiso      1.00\n"

```

```

#Output file as*.txt
date_str = datetime.datetime.now().strftime("%Y%m%d")
with open(f"{date_str}_outputcif.txt", "w") as file:
    file.write(output)

```

```

#Statistical paragraph information

```

```

zrnum = 0
tinum = 0
supercells = []
for mn in range(800):
    if atomunit == "Zr":
        zrnum += 1
    elif atomunit == "Ti":
        tinum += 1

    if mn in [1, 3, 5, 7, 9, 11, 13, 15, 17, 19, 41, 43, 45, 47, 49, 51, 53, 55, 57, 59, 81, 83, 85,
87, 89, 91, 93, 95, 97, 99, 121, 123, 125, 127, 129, 131, 133, 135, 137, 139, 161, 163, 165, 167,
169, 171, 173, 175, 177, 179]:
        supercells.append([output[mn], output[mn+1], output[mn+20], output[mn+21],
output[mn+200], output[mn+201], output[mn+220], output[mn+221]])

```

```

PZT1 = [Ti.Ti.Ti.Ti.Ti.Ti.Ti.Ti]
PZT2 = [Ti.Ti.Zr.Ti.Ti.Ti.Ti.Ti] or [Zr.Ti.Ti.Ti.Ti.Ti.Ti.Ti]or [Ti.Zr.Ti.Ti.Ti.Ti.Ti.Ti]or
[Ti.Ti.Ti.Zr.Ti.Ti.Ti.Ti]or [Ti.Ti.Ti.Ti.Zr.Ti.Ti.Ti]or [Ti.Ti.Ti.Ti.Ti.Zr.Ti.Ti]or
[Ti.Ti.Ti.Ti.Ti.Ti.Zr.Ti]or [Ti.Ti.Ti.Ti.Ti.Ti.Zr]
PZT3 = [Ti.Ti.Zr.Zr.Ti.Ti.Ti.Ti]or [Zr.Zr.Ti.Ti.Ti.Ti.Ti]or [Ti.Ti.Ti.Ti.Zr.Zr.Ti.Ti]or
[Ti.Ti.Ti.Ti.Ti.Zr.Zr]or [Zr.Ti.Zr.Ti.Ti.Ti.Ti]or [Ti.Zr.Ti.Zr.Ti.Ti.Ti]or
[Ti.Ti.Ti.Ti.Zr.Ti.Zr.Ti]or [Ti.Ti.Ti.Ti.Ti.Zr.Ti.Zr]or [Zr.Ti.Ti.Ti.Zr.Ti.Ti]or
[Ti.Zr.Ti.Ti.Ti.Zr.Ti.Ti]or [Ti.Ti.Zr.Ti.Ti.Ti.Zr.Ti]or [Ti.Ti.Ti.Zr.Ti.Ti.Zr]
PZT4 = [Zr.Ti.Ti.Ti.Ti.Zr.Ti.Ti]or [Ti.Zr.Ti.Ti.Zr.Ti.Ti.Ti]or [Ti.Ti.Zr.Ti.Ti.Ti.Zr]or
[Ti.Ti.Ti.Zr.Ti.Ti.Zr.Ti]or [Zr.Ti.Ti.Zr.Ti.Ti.Ti]or [Ti.Zr.Zr.Ti.Ti.Ti.Ti]or
[Ti.Ti.Ti.Ti.Zr.Ti.Ti.Zr]or [Ti.Ti.Ti.Ti.Ti.Zr.Zr.Ti]or [Zr.Ti.Ti.Ti.Ti.Zr.Ti]or
[Ti.Ti.Zr.Ti.Zr.Ti.Ti.Ti]or [Ti.Zr.Ti.Ti.Ti.Ti.Zr]or [Ti.Ti.Ti.Zr.Ti.Zr.Ti.Ti]

```

PZT5 = [Ti.Ti.Ti.Zr.Zr.Ti.Ti.Ti]or [Ti.Zr.Ti.Ti.Ti.Ti.Zr.Ti]or [Ti.Ti.Zr.Ti.Ti.Zr.Ti.Ti]or  
 [Zr.Ti.Ti.Ti.Ti.Ti.Zr]

PZT6 = [Zr.Zr.Zr.Ti.Ti.Ti.Ti.Ti]or [Zr.Zr.Ti.Zr.Ti.Ti.Ti.Ti]or [Zr.Ti.Zr.Zr.Ti.Ti.Ti.Ti]or  
 [Ti.Zr.Zr.Zr.Ti.Ti.Ti.Ti]or [Ti.Ti.Ti.Ti.Zr.Zr.Zr.Ti]or [Ti.Ti.Ti.Ti.Zr.Zr.Ti.Zr]or  
 [Ti.Ti.Ti.Ti.Zr.Ti.Zr.Zr]or [Ti.Ti.Zr.Ti.Ti.Zr.Zr.Zr]or [Zr.Zr.Ti.Ti.Zr.Ti.Ti.Ti]or  
 [Zr.Zr.Ti.Ti.Ti.Zr.Ti.Ti]or [Ti.Zr.Ti.Ti.Zr.Zr.Ti.Ti]or [Zr.Ti.Ti.Ti.Zr.Zr.Ti.Ti]or  
 [Ti.Ti.Zr.Zr.Ti.Ti.Zr.Ti]or [Ti.Ti.Zr.Zr.Ti.Ti.Ti.Zr]or [Ti.Ti.Zr.Ti.Ti.Ti.Zr.Zr]or  
 [Ti.Ti.Ti.Zr.Ti.Ti.Zr.Zr]or [Zr.Ti.Zr.Ti.Zr.Ti.Ti.Ti]or [Zr.Ti.Zr.Ti.Ti.Ti.Zr.Ti]or  
 [Ti.Ti.Zr.Ti.Zr.Ti.Zr.Ti]or [Zr.Ti.Ti.Ti.Zr.Ti.Zr.Ti]or [Ti.Zr.Ti.Zr.Ti.Zr.Ti.Ti]or  
 [Ti.Zr.Ti.Zr.Ti.Ti.Ti.Zr]or [Ti.Zr.Ti.Ti.Ti.Zr.Ti.Zr]or [Ti.Ti.Ti.Zr.Ti.Zr.Ti.Zr]

PZT7 = [Ti.Ti.Zr.Zr.Ti.Zr.Ti.Ti]or [Ti.Ti.Zr.Zr.Zr.Ti.Ti.Ti]or [Zr.Zr.Ti.Ti.Ti.Ti.Zr.Ti]or  
 [Zr.Zr.Ti.Ti.Ti.Ti.Zr]or [Ti.Ti.Zr.Ti.Zr.Zr.Ti.Ti]or [Ti.Ti.Ti.Zr.Zr.Zr.Ti.Ti]or  
 [Zr.Ti.Ti.Ti.Ti.Ti.Zr.Zr]or [Ti.Zr.Ti.Ti.Ti.Ti.Zr.Zr]or [Zr.Ti.Zr.Ti.Ti.Zr.Ti.Ti]or  
 [Zr.Ti.Zr.Ti.Ti.Ti.Zr]or [Ti.Zr.Ti.Zr.Zr.Ti.Ti.Ti]or [Ti.Zr.Ti.Zr.Ti.Ti.Zr.Ti]or  
 [Ti.Zr.Ti.Ti.Zr.Ti.Zr.Ti]or [Ti.Ti.Ti.Zr.Zr.Ti.Zr.Ti]or [Ti.Ti.Zr.Ti.Ti.Zr.Ti.Zr]or  
 [Zr.Ti.Ti.Ti.Zr.Ti.Ti.Zr]or [Zr.Ti.Ti.Zr.Zr.Ti.Ti.Ti]or [Zr.Ti.Ti.Ti.Zr.Ti.Ti.Zr]or  
 [Ti.Zr.Zr.Ti.Ti.Ti.Zr.Ti]or [Ti.Ti.Zr.Ti.Ti.Zr.Zr.Ti]or [Ti.Zr.Zr.Ti.Ti.Zr.Ti.Ti]or  
 [Ti.Zr.Ti.Ti.Ti.Zr.Zr.Ti]or [Zr.Ti.Ti.Zr.Ti.Ti.Ti.Zr]or [Ti.Ti.Ti.Zr.Zr.Ti.Ti.Zr]

PZT8 = [Ti.Zr.Zr.Ti.Ti.Ti.Ti.Zr]or [Ti.Zr.Zr.Ti.Zr.Ti.Ti.Ti]or [Zr.Ti.Ti.Zr.Ti.Zr.Ti.Ti]or  
 [Zr.Ti.Ti.Zr.Ti.Ti.Zr.Ti]or [Ti.Ti.Zr.Ti.Zr.Ti.Ti.Zr]or [Ti.Zr.Ti.Ti.Zr.Ti.Ti.Zr]or  
 [Zr.Ti.Ti.Ti.Ti.Zr.Zr.Ti]or [Ti.Ti.Ti.Zr.Ti.Zr.Zr.Ti]

PZT9 = [Ti.Zr.Zr.Ti.Zr.Ti.Ti.Zr]or [Zr.Ti.Ti.Zr.Ti.Zr.Zr.Ti]

PZT10 = [Zr.Zr.Ti.Ti.Ti.Ti.Zr.Zr]or [Ti.Ti.Zr.Zr.Ti.Zr.Zr.Ti]or [Zr.Ti.Zr.Ti.Ti.Ti.Zr.Zr]or  
 [Ti.Zr.Ti.Zr.Zr.Ti.Zr.Ti]or [Zr.Ti.Ti.Zr.Zr.Ti.Ti.Zr]or [Ti.Zr.Zr.Ti.Ti.Zr.Zr.Ti]

PZT11 = [Zr.Zr.Zr.Zr.Ti.Ti.Ti.Ti]or [Ti.Ti.Ti.Ti.Zr.Zr.Zr.Zr]or [Zr.Zr.Ti.Ti.Zr.Zr.Ti.Ti]or  
 [Ti.Ti.Zr.Zr.Ti.Ti.Zr.Zr]or [Zr.Ti.Zr.Ti.Zr.Ti.Zr.Ti]or [Ti.Zr.Ti.Zr.Ti.Zr.Ti.Zr]

PZT14 = [Zr.Ti.Zr.Zr.Ti.Ti.Ti.Zr]or [Zr.Ti.Zr.Zr.Zr.Ti.Ti.Ti]or [Ti.Zr.Zr.Zr.Ti.Zr.Ti.Ti]or  
 [Ti.Zr.Zr.Zr.Ti.Ti.Zr.Ti]or [Zr.Zr.Ti.Zr.Zr.Ti.Ti.Ti]or [Zr.Zr.Ti.Zr.Ti.Ti.Zr]or  
 [Zr.Zr.Zr.Ti.Ti.Ti.Zr.Ti]or [Zr.Zr.Zr.Ti.Ti.Zr.Ti.Ti]or [Ti.Ti.Ti.Zr.Zr.Ti.Zr.Zr]or  
 [Zr.Ti.Ti.Ti.Zr.Zr.Zr]or [Ti.Zr.Ti.Ti.Ti.Zr.Zr.Zr]or [Ti.Ti.Zr.Ti.Ti.Zr.Zr.Zr]or  
 [Ti.Ti.Zr.Ti.Ti.Zr.Zr.Zr]or [Zr.Zr.Zr.Ti.Ti.Zr.Ti.Ti]or [Zr.Zr.Ti.Ti.Zr.Zr.Zr]or  
 [Zr.Ti.Zr.Ti.Ti.Zr.Zr.Zr]or [Ti.Zr.Zr.Zr.Zr.Ti.Zr.Ti]or [Zr.Zr.Ti.Ti.Zr.Ti.Zr.Ti]or  
 [Zr.Ti.Ti.Ti.Zr.Zr.Zr]or [Zr.Zr.Ti.Zr.Ti.Ti.Ti.Zr]or [Ti.Zr.Ti.Zr.Ti.Ti.Zr.Zr]or  
 [Ti.Zr.Zr.Zr.Ti.Zr.Ti]or [Ti.Zr.Ti.Zr.Zr.Zr.Ti.Ti]or [Ti.Ti.Zr.Zr.Ti.Zr.Ti.Zr]or  
 [Ti.Ti.Ti.Zr.Zr.Zr.Ti.Zr]or [Zr.Zr.Ti.Ti.Ti.Zr.Ti.Zr]or [Ti.Zr.Ti.Ti.Ti.Zr.Zr.Zr]

PZT13 = [Ti.Zr.Zr.Zr.Ti.Ti.Ti.Zr]or [Zr.Zr.Zr.Ti.Zr.Ti.Ti.Ti]or [Zr.Zr.Ti.Zr.Ti.Zr.Ti.Ti]or  
[Zr.Ti.Zr.Zr.Ti.Ti.Zr.Ti]or [Zr.Ti.Ti.Ti.Zr.Zr.Zr.Ti]or [Ti.Zr.Ti.Ti.Zr.Zr.Ti.Zr]or  
[Ti.Ti.Zr.Ti.Zr.Ti.Zr.Zr]or [Ti.Ti.Ti.Zr.Ti.Zr.Zr.Zr]

PZT12 = [Ti.Zr.Zr.Zr.Zr.Ti.Ti.Ti]or [Zr.Ti.Zr.Zr.Ti.Zr.Ti.Ti]or [Zr.Zr.Ti.Zr.Ti.Ti.Zr.Ti]or  
[Zr.Ti.Zr.Zr.Ti.Ti.Ti.Zr]or [Zr.Ti.Ti.Ti.Ti.Zr.Zr.Zr]or [Ti.Zr.Ti.Ti.Zr.Ti.Zr.Zr]or  
[Ti.Ti.Zr.Ti.Zr.Zr.Ti.Zr]or [Ti.Ti.Ti.Zr.Zr.Ti.Zr.Zr]or [Ti.Zr.Zr.Ti.Zr.Zr.Ti.Ti]or  
[Zr.Ti.Ti.Zr.Zr.Zr.Ti.Ti]or [Zr.Ti.Ti.Zr.Zr.Ti.Zr.Ti]or [Ti.Ti.Zr.Zr.Ti.Zr.Ti.Zr]or  
[Zr.Zr.Ti.Ti.Ti.Zr.Zr.Ti]or [Zr.Zr.Ti.Ti.Zr.Ti.Ti.Zr]or [Zr.Ti.Zr.Ti.Zr.Ti.Ti.Zr]or  
[Ti.Zr.Ti.Zr.Ti.Ti.Zr.Zr]or [Ti.Zr.Zr.Ti.Zr.Ti.Zr.Ti]or [Zr.Ti.Ti.Zr.Ti.Zr.Ti.Zr]or  
[Zr.Ti.Ti.Zr.Ti.Ti.Zr.Zr]or [Ti.Ti.Zr.Zr.Ti.Ti.Zr.Zr]or [Zr.Ti.Zr.Ti.Ti.Zr.Zr.Ti]or  
[Ti.Zr.Ti.Zr.Zr.Ti.Ti.Zr]or [Ti.Ti.Zr.Zr.Zr.Ti.Ti.Zr]or [Ti.Ti.Zr.Zr.Ti.Ti.Zr.Zr]

PZT22 = [Zr.Zr.Zr.Zr.Zr.Zr.Zr.Zr]

PZT21 = [Zr.Zr.Ti.Zr.Zr.Zr.Zr.Zr] or [Ti.Zr.Zr.Zr.Zr.Zr.Zr.Zr]or [Zr.Ti.Zr.Zr.Zr.Zr.Zr.Zr]or  
[Zr.Zr.Zr.Ti.Zr.Zr.Zr.Zr]or [Zr.Zr.Zr.Zr.Ti.Zr.Zr.Zr]or [Zr.Zr.Zr.Zr.Zr.Ti.Zr.Zr]or  
[Zr.Zr.Zr.Zr.Zr.Zr.Ti.Zr]or [Zr.Zr.Zr.Zr.Zr.Zr.Ti]

PZT20 = [Zr.Zr.Ti.Ti.Zr.Zr.Zr.Zr]or [Ti.Ti.Zr.Zr.Zr.Zr.Zr.Zr]or [Zr.Zr.Zr.Zr.Ti.Ti.Zr.Zr]or  
[Zr.Zr.Zr.Zr.Zr.Zr.Ti.Ti]or [Ti.Zr.Ti.Zr.Zr.Zr.Zr.Zr]or [Zr.Ti.Zr.Ti.Zr.Zr.Zr.Zr]or  
[Zr.Zr.Zr.Zr.Ti.Zr.Ti.Zr]or [Zr.Zr.Zr.Zr.Zr.Ti.Zr.Ti]or [Ti.Zr.Zr.Zr.Ti.Zr.Zr.Zr]or  
[Zr.Ti.Zr.Zr.Zr.Ti.Zr.Zr]or [Zr.Zr.Ti.Zr.Zr.Zr.Ti.Zr]or [Zr.Zr.Zr.Ti.Zr.Zr.Zr.Ti]

PZT19 = [Ti.Zr.Zr.Zr.Zr.Ti.Zr.Zr]or [Zr.Ti.Zr.Zr.Ti.Zr.Zr.Zr]or [Zr.Zr.Ti.Zr.Zr.Zr.Zr.Ti]or  
[Zr.Zr.Zr.Ti.Zr.Zr.Ti.Zr]or [Ti.Zr.Zr.Ti.Zr.Zr.Zr.Zr]or [Zr.Ti.Ti.Zr.Zr.Zr.Zr.Zr]or  
[Zr.Zr.Zr.Zr.Ti.Zr.Zr.Ti]or [Zr.Zr.Zr.Zr.Zr.Ti.Ti.Zr]or [Ti.Zr.Zr.Zr.Zr.Zr.Ti.Zr]or  
[Zr.Zr.Ti.Zr.Ti.Zr.Zr.Zr]or [Zr.Ti.Zr.Zr.Zr.Zr.Ti]or [Zr.Zr.Zr.Ti.Zr.Ti.Zr.Zr]

PZT18 = [Zr.Zr.Zr.Ti.Ti.Zr.Zr.Zr]or [Zr.Ti.Zr.Zr.Zr.Zr.Ti.Zr]or [Zr.Zr.Ti.Zr.Zr.Ti.Zr.Zr]or  
[Ti.Zr.Zr.Zr.Zr.Zr.Zr.Ti]

PZT17 = [Ti.Ti.Ti.Zr.Zr.Zr.Zr.Zr]or [Ti.Ti.Zr.Ti.Zr.Zr.Zr.Zr]or [Ti.Zr.Ti.Ti.Zr.Zr.Zr.Zr]or  
[Zr.Ti.Ti.Ti.Zr.Zr.Zr.Zr]or [Zr.Zr.Zr.Zr.Ti.Ti.Ti.Zr]or [Zr.Zr.Zr.Zr.Ti.Ti.Zr.Ti]or  
[Zr.Zr.Zr.Zr.Ti.Zr.Ti.Ti]or [Zr.Zr.Ti.Zr.Zr.Ti.Ti.Ti]or [Ti.Ti.Zr.Zr.Ti.Zr.Zr.Zr]or  
[Ti.Ti.Zr.Zr.Zr.Ti.Zr.Zr]or [Zr.Ti.Zr.Zr.Ti.Ti.Zr.Zr]or [Ti.Zr.Zr.Zr.Ti.Ti.Zr.Zr]or  
[Zr.Zr.Ti.Ti.Zr.Zr.Ti.Zr]or [Zr.Zr.Ti.Ti.Zr.Zr.Zr.Ti]or [Zr.Zr.Ti.Zr.Zr.Zr.Ti.Ti]or  
[Zr.Zr.Zr.Ti.Zr.Zr.Ti.Ti]or [Ti.Zr.Ti.Zr.Ti.Zr.Zr.Zr]or [Ti.Zr.Ti.Zr.Zr.Zr.Ti.Zr]or  
[Zr.Zr.Ti.Zr.Ti.Zr.Ti.Zr]or [Ti.Zr.Zr.Zr.Ti.Zr.Ti.Zr]or [Zr.Ti.Zr.Ti.Zr.Ti.Zr.Zr]or  
[Zr.Ti.Zr.Ti.Zr.Zr.Zr.Ti]or [Zr.Ti.Zr.Zr.Zr.Ti.Zr.Ti]or [Zr.Zr.Zr.Ti.Zr.Ti.Zr.Ti]

PZT16 = [Zr.Zr.Ti.Ti.Zr.Ti.Zr.Zr]or [Zr.Zr.Ti.Ti.Ti.Zr.Zr.Zr]or [Ti.Ti.Zr.Zr.Zr.Zr.Ti.Zr]or  
[Ti.Ti.Zr.Zr.Zr.Zr.Zr.Ti]or [Zr.Zr.Ti.Zr.Ti.Ti.Zr.Zr]or [Zr.Zr.Zr.Ti.Ti.Ti.Zr.Zr]or  
[Ti.Zr.Zr.Zr.Zr.Zr.Ti.Ti]or [Zr.Ti.Zr.Zr.Zr.Zr.Ti.Ti]or [Ti.Zr.Ti.Zr.Zr.Ti.Zr.Zr]or  
[Ti.Zr.Ti.Zr.Zr.Zr.Zr.Ti]or [Zr.Ti.Zr.Ti.Ti.Zr.Zr.Zr]or [Zr.Ti.Zr.Ti.Zr.Zr.Ti.Zr]or  
[Zr.Ti.Zr.Zr.Ti.Zr.Ti.Zr]or [Zr.Zr.Zr.Ti.Ti.Zr.Ti.Zr]or [Zr.Zr.Ti.Zr.Zr.Ti.Zr.Ti]or  
[Ti.Zr.Zr.Zr.Zr.Ti.Zr.Ti]or [Ti.Zr.Zr.Ti.Ti.Zr.Zr.Zr]or [Ti.Zr.Zr.Zr.Ti.Zr.Zr.Ti]or  
[Zr.Ti.Ti.Zr.Zr.Zr.Ti.Zr]or [Zr.Zr.Ti.Zr.Zr.Ti.Ti.Zr]or [Zr.Ti.Ti.Zr.Zr.Ti.Zr.Zr]or  
[Zr.Ti.Zr.Zr.Zr.Ti.Ti.Zr]or [Ti.Zr.Zr.Ti.Zr.Zr.Zr.Ti]or [Zr.Zr.Zr.Ti.Ti.Zr.Zr.Ti]

PZT15 = [Zr.Ti.Ti.Zr.Zr.Zr.Zr.Ti]or [Zr.Ti.Ti.Zr.Ti.Zr.Zr.Zr]or [Ti.Zr.Zr.Ti.Zr.Ti.Zr.Zr]or  
[Ti.Zr.Zr.Ti.Zr.Zr.Ti.Zr]or [Zr.Zr.Ti.Zr.Ti.Zr.Zr.Ti]or [Zr.Ti.Zr.Zr.Ti.Zr.Zr.Ti]or  
[Ti.Zr.Zr.Zr.Zr.Ti.Ti.Zr]or [Zr.Zr.Zr.Ti.Zr.Ti.Ti.Zr]

```

#Count the number of different supercell arrays
unique_supercells = len(set(map(tuple, supercells)))

#Generate result output
result_output = f"the zr cell's number is {zrnum}    the ti cell's number is {tinum}    the numbe
of different supercell arrays is {unique_supercells}"
with open(f"{date_str}_result_outputs.txt", "w") as file:
    file.write(result_output)

```

**TableS2.** The Born effective charge of each central atoms of supercells.

| supercell | Zc1   | Zc2   | Zc3   | Zc4    | Zc5    | Zc6        | Zc7   | Zc8   |
|-----------|-------|-------|-------|--------|--------|------------|-------|-------|
| 1         | 6.658 | 6.563 | 6.736 | 8.290  | 8.121  | 8.486      | 6.438 | 6.318 |
| 2         | 9.158 | 9.147 | 9.327 | 10.768 | 10.547 | 11.08<br>0 | 8.904 | 8.692 |
| 3         | 4.554 | 4.544 | 4.635 | 6.210  | 6.082  | 6.388      | 4.488 | 4.327 |
| 4         | 5.430 | 5.420 | 5.528 | 7.077  | 6.931  | 7.281      | 5.323 | 5.162 |
| 5         | 5.705 | 5.694 | 5.808 | 7.349  | 7.198  | 7.561      | 5.599 | 5.410 |
| 6         | 4.563 | 4.553 | 4.645 | 6.215  | 6.087  | 6.393      | 4.496 | 4.348 |
| 7         | 6.650 | 6.640 | 6.771 | 8.278  | 8.108  | 8.517      | 6.521 | 6.310 |
| 8         | 4.495 | 4.485 | 4.575 | 6.148  | 6.022  | 6.324      | 4.439 | 4.272 |
| 9         | 8.483 | 6.472 | 6.601 | 8.112  | 6.945  | 8.346      | 8.328 | 6.185 |
| 10        | 6.484 | 6.474 | 6.602 | 8.119  | 7.952  | 8.354      | 6.356 | 6.142 |
| 11        | 3.926 | 3.915 | 3.995 | 5.587  | 5.472  | 5.747      | 3.891 | 3.726 |
| 12        | 8.104 | 7.094 | 7.234 | 8.934  | 8.554  | 8.986      | 6.636 | 6.946 |
| 13        | 8.017 | 7.007 | 7.164 | 9.635  | 8.436  | 8.914      | 6.773 | 7.658 |
| 14        | 7.473 | 8.915 | 7.620 | 9.102  | 8.482  | 8.365      | 6.291 | 7.131 |
| 15        | 6.763 | 6.754 | 6.887 | 8.397  | 8.224  | 8.640      | 6.627 | 6.403 |
| 16        | 4.179 | 4.169 | 4.253 | 5.837  | 5.717  | 6.004      | 4.128 | 3.976 |
| 17        | 4.985 | 4.976 | 5.075 | 6.632  | 6.495  | 6.823      | 4.880 | 4.770 |
| 18        | 5.690 | 5.681 | 5.793 | 7.333  | 7.182  | 7.544      | 5.602 | 5.386 |
| 19        | 5.330 | 5.320 | 5.426 | 6.973  | 6.830  | 7.174      | 5.220 | 5.090 |
| 20        | 7.229 | 7.220 | 7.362 | 8.853  | 8.671  | 9.109      | 7.061 | 6.873 |
| 21        | 5.503 | 5.492 | 5.602 | 7.150  | 7.003  | 7.355      | 5.351 | 5.272 |
| 22        | 3.537 | 3.527 | 3.599 | 5.198  | 5.091  | 5.346      | 3.474 | 3.413 |

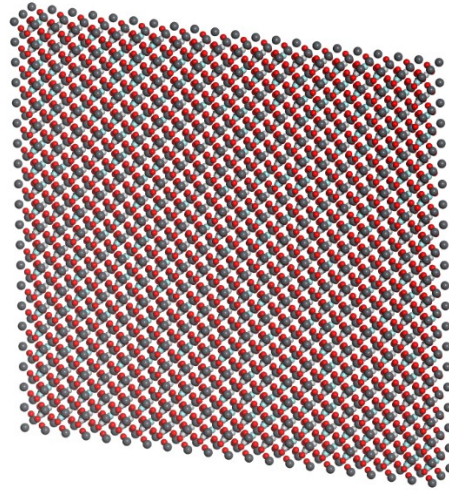

**FigS1.** The schematic of the computational model of the classical Monte Carlo method.

**TableS3.** The displacement of each central atoms of supercells.

| supercells | Dc1      | Dc2      | Dc3    | Dc4      | Dc5      | Dc6    | Dc7      | Dc8      |
|------------|----------|----------|--------|----------|----------|--------|----------|----------|
| 1          | 0.00509  | 0.004921 | 0.4646 | 0.005023 | 0.004877 | 0.5354 | 0.005264 | 0.00506  |
| 2          | 0.004752 | 0.004715 | 0.5061 | 0.00496  | 0.005002 | 0.5182 | 0.005149 | 0.004657 |
| 3          | 0.004665 | 0.005341 | 0.5226 | 0.004776 | 0.004611 | 0.468  | 0.005018 | 0.004607 |
| 4          | 0.004982 | 0.004682 | 0.4842 | 0.004809 | 0.005268 | 0.5097 | 0.004681 | 0.005446 |
| 5          | 0.005349 | 0.005275 | 0.4784 | 0.005317 | 0.004684 | 0.485  | 0.004985 | 0.004641 |
| 6          | 0.004773 | 0.005427 | 0.4867 | 0.005439 | 0.005011 | 0.5471 | 0.005339 | 0.00511  |
| 7          | 0.004793 | 0.005039 | 0.5299 | 0.004654 | 0.005176 | 0.467  | 0.004912 | 0.004832 |
| 8          | 0.005229 | 0.004675 | 0.5116 | 0.004601 | 0.004717 | 0.5314 | 0.005077 | 0.004982 |
| 9          | 0.005112 | 0.004873 | 0.4853 | 0.00541  | 0.005353 | 0.4615 | 0.005235 | 0.005007 |
| 10         | 0.005071 | 0.004979 | 0.5091 | 0.005023 | 0.005014 | 0.4856 | 0.005444 | 0.005023 |
| 11         | 0.004976 | 0.005117 | 0.4687 | 0.005022 | 0.005318 | 0.471  | 0.005018 | 0.005245 |
| 12         | 0.004613 | 0.004945 | 0.4679 | 0.004821 | 0.005305 | 0.4913 | 0.005434 | 0.005043 |
| 13         | 0.004907 | 0.004752 | 0.482  | 0.004731 | 0.004809 | 0.4991 | 0.004668 | 0.004985 |
| 14         | 0.0046   | 0.004671 | 0.4609 | 0.005058 | 0.005197 | 0.5159 | 0.005426 | 0.004699 |
| 15         | 0.005476 | 0.005432 | 0.4764 | 0.005415 | 0.004776 | 0.5487 | 0.004752 | 0.004635 |
| 16         | 0.005496 | 0.005086 | 0.4994 | 0.005339 | 0.005273 | 0.4633 | 0.00541  | 0.004619 |
| 17         | 0.005116 | 0.00477  | 0.5314 | 0.005481 | 0.004855 | 0.4823 | 0.004774 | 0.004925 |
| 18         | 0.00495  | 0.004821 | 0.5443 | 0.004717 | 0.004924 | 0.544  | 0.004689 | 0.00518  |
| 19         | 0.004713 | 0.004602 | 0.5152 | 0.005149 | 0.005149 | 0.486  | 0.004878 | 0.005207 |
| 20         | 0.004687 | 0.00548  | 0.538  | 0.005182 | 0.004863 | 0.5223 | 0.005079 | 0.004983 |
| 21         | 0.005168 | 0.004832 | 0.5465 | 0.005484 | 0.0049   | 0.4614 | 0.00473  | 0.005113 |
| 22         | 0.00532  | 0.005185 | 0.5278 | 0.004729 | 0.005418 | 0.4744 | 0.004709 | 0.004715 |

**TableS4.** The comparison of Born effective charge in different configurations of supercells.

| supercells | Zc1   | Zc2   | Zc3   | Zc4   | Zc5   | Zc6   | Zc7   | Zc8   | softest model frq |
|------------|-------|-------|-------|-------|-------|-------|-------|-------|-------------------|
| 3a         | 4.554 | 4.544 | 4.635 | 6.210 | 6.082 | 6.388 | 4.488 | 4.327 | -0.642857         |

|     |       |       |       |       |       |       |       |       |              |
|-----|-------|-------|-------|-------|-------|-------|-------|-------|--------------|
| 3b  | 4.485 | 4.485 | 4.533 | 6.452 | 6.228 | 6.279 | 4.537 | 4.487 | -0.096857128 |
| 4a  | 5.430 | 5.420 | 5.528 | 7.077 | 6.931 | 7.281 | 5.323 | 5.162 | 1.43878      |
| 4b  | 5.180 | 5.545 | 5.523 | 6.737 | 6.848 | 6.997 | 5.121 | 5.100 | 0.30496388   |
| 6a  | 4.563 | 4.553 | 4.645 | 6.215 | 6.087 | 6.393 | 4.496 | 4.348 | -0.642857    |
| 6b  | 4.454 | 4.339 | 4.501 | 6.345 | 5.990 | 6.450 | 4.325 | 4.353 | -1.29856994  |
| 7a  | 6.650 | 6.640 | 6.771 | 8.278 | 8.108 | 8.517 | 6.521 | 6.310 | 0.397959     |
| 7b  | 6.530 | 6.826 | 7.096 | 8.460 | 7.775 | 8.338 | 6.703 | 6.625 | 0.243584     |
| 10a | 6.484 | 6.474 | 6.602 | 8.119 | 7.952 | 8.354 | 6.356 | 6.142 | -2.20408     |
| 10b | 6.497 | 6.163 | 6.404 | 8.282 | 7.976 | 8.696 | 6.051 | 6.142 | -1.9085552   |
| 11a | 3.926 | 3.915 | 3.995 | 5.587 | 5.472 | 5.747 | 3.891 | 3.726 | -2.72449     |
| 11b | 4.118 | 3.802 | 3.891 | 5.593 | 5.450 | 5.615 | 4.019 | 3.838 | -1.82529613  |
| 12a | 7.104 | 7.094 | 7.234 | 8.734 | 8.554 | 8.986 | 6.936 | 6.746 | -1.16327     |
| 12b | 7.069 | 7.016 | 7.155 | 9.066 | 8.922 | 9.229 | 6.631 | 6.456 | -2.11906574  |
| 14a | 7.482 | 7.473 | 7.620 | 9.102 | 8.915 | 9.365 | 7.291 | 7.131 | -1.16327     |
| 14b | 7.714 | 7.622 | 7.734 | 9.238 | 8.745 | 8.991 | 7.532 | 7.209 | -1.11092285  |
| 16a | 4.179 | 4.169 | 4.253 | 5.837 | 5.717 | 6.004 | 4.128 | 3.976 | -3.76531     |
| 16b | 4.263 | 4.202 | 4.219 | 5.714 | 5.757 | 5.848 | 4.252 | 4.131 | -2.94981019  |
| 17a | 4.985 | 4.976 | 5.075 | 6.632 | 6.495 | 6.823 | 4.880 | 4.770 | -6.36735     |
| 17b | 5.055 | 5.115 | 5.242 | 6.320 | 6.599 | 6.980 | 4.846 | 4.546 | -2.1635948   |
| 19a | 5.330 | 5.320 | 5.426 | 6.973 | 6.830 | 7.174 | 5.220 | 5.090 | -14.6939     |
| 19b | 5.229 | 5.570 | 5.513 | 7.224 | 6.857 | 7.439 | 5.283 | 5.156 | -21.253083   |
| 20a | 7.229 | 7.220 | 7.362 | 8.853 | 8.671 | 9.109 | 7.061 | 6.873 | -22.5        |
| 20b | 7.583 | 7.583 | 7.384 | 9.048 | 8.740 | 8.790 | 6.708 | 7.154 | -18.1075     |

**TableS5.** The Born effective charge and softest frequency of Rhombohedral supercells.

| supercells | Zc1   | Zc2   | Zc3   | Zc4   | Zc5   | Zc6   | Zc7   | Zc8   | softest model frq |
|------------|-------|-------|-------|-------|-------|-------|-------|-------|-------------------|
| 1          | 7.358 | 7.358 | 7.358 | 7.358 | 7.358 | 7.358 | 7.358 | 7.358 | 1.74955648        |
| 2          | 8.112 | 7.579 | 7.991 | 8.112 | 7.634 | 7.921 | 8.112 | 7.889 | 1.50640266        |
| 3a         | 8.296 | 8.296 | 7.883 | 7.883 | 8.259 | 8.259 | 8.296 | 8.271 | 0.331190774       |
| 3b         | 8.365 | 8.365 | 7.946 | 7.946 | 8.327 | 8.327 | 8.365 | 8.340 | 0.32539646        |
| 4a         | 7.604 | 7.932 | 7.397 | 7.412 | 7.856 | 7.604 | 7.412 | 7.624 | -0.738642693      |
| 4b         | 7.662 | 7.995 | 7.452 | 7.467 | 7.917 | 7.662 | 7.467 | 7.682 | -1.466085462      |
| 5          | 7.760 | 7.760 | 7.425 | 7.760 | 7.760 | 7.425 | 7.760 | 7.648 | -1.533611099      |
| 6a         | 8.203 | 7.534 | 7.875 | 8.753 | 7.221 | 8.401 | 8.753 | 8.125 | 0.405520221       |
| 6b         | 8.270 | 7.591 | 7.937 | 8.830 | 7.273 | 8.472 | 8.830 | 8.191 | 0.307159424       |
| 7a         | 7.467 | 8.682 | 7.415 | 7.576 | 8.445 | 8.434 | 7.820 | 8.233 | 0.272326912       |
| 7b         | 7.523 | 8.757 | 7.470 | 7.633 | 8.516 | 8.505 | 7.881 | 8.301 | -2.67134496       |
| 8          | 8.045 | 8.405 | 8.405 | 7.864 | 7.333 | 7.381 | 8.405 | 7.706 | -2.061239616      |
| 9          | 7.732 | 7.939 | 7.939 | 7.732 | 7.939 | 7.732 | 7.732 | 7.801 | -3.52276557       |
| 10a        | 8.215 | 8.215 | 8.627 | 8.627 | 8.627 | 8.627 | 8.215 | 8.490 | -2.79532674       |
| 10b        | 8.283 | 8.283 | 8.701 | 8.701 | 8.701 | 8.701 | 8.283 | 8.562 | -2.191113975      |
| 11a        | 8.584 | 8.584 | 8.584 | 8.584 | 7.953 | 7.953 | 7.953 | 7.953 | -2.361933192      |
| 11b        | 8.658 | 8.658 | 8.658 | 8.658 | 8.017 | 8.017 | 8.017 | 8.017 | -1.37149533       |



|     |       |       |       |       |       |       |       |       |              |
|-----|-------|-------|-------|-------|-------|-------|-------|-------|--------------|
| 12a | 8.507 | 8.460 | 8.976 | 8.807 | 8.939 | 9.190 | 8.814 | 8.981 | -1.4308221   |
| 12b | 8.580 | 8.532 | 9.056 | 8.884 | 9.019 | 9.275 | 8.892 | 9.062 | -2.280114736 |
| 13  | 8.804 | 9.217 | 9.384 | 9.213 | 8.381 | 9.262 | 9.569 | 9.070 | -4.16066755  |
| 14a | 9.450 | 8.855 | 9.154 | 8.381 | 9.282 | 8.684 | 9.335 | 9.100 | -1.42151594  |
| 14b | 9.540 | 8.933 | 9.237 | 8.451 | 9.368 | 8.760 | 9.422 | 9.183 | -1.227569749 |
| 15  | 8.827 | 8.397 | 8.397 | 8.940 | 8.397 | 7.882 | 8.974 | 8.418 | -3.584019381 |
| 16a | 8.556 | 8.374 | 7.875 | 8.628 | 8.327 | 8.714 | 8.604 | 8.548 | -4.60497413  |
| 16b | 8.629 | 8.444 | 7.937 | 8.703 | 8.396 | 8.790 | 8.679 | 8.621 | -6.56473785  |
| 17a | 8.498 | 8.524 | 8.738 | 8.638 | 8.774 | 9.042 | 8.638 | 8.818 | -3.772807233 |
| 17b | 8.570 | 8.597 | 8.814 | 8.712 | 8.851 | 9.124 | 8.712 | 8.896 | -6.45012555  |
| 18  | 7.955 | 7.955 | 8.503 | 7.955 | 7.955 | 8.503 | 7.955 | 8.137 | -2.54655108  |
| 19a | 8.766 | 8.150 | 8.826 | 8.829 | 8.041 | 8.766 | 8.829 | 8.545 | -2.399426633 |
| 19b | 8.843 | 8.216 | 8.904 | 8.907 | 8.106 | 8.843 | 8.907 | 8.618 | -18.4849262  |
| 20a | 8.670 | 8.670 | 7.718 | 7.718 | 8.564 | 8.564 | 8.670 | 8.599 | -15.1787987  |
| 20b | 8.746 | 8.746 | 7.777 | 7.777 | 8.637 | 8.637 | 8.746 | 8.673 | -23.93097146 |
| 21  | 8.555 | 8.944 | 9.073 | 8.555 | 8.503 | 8.141 | 8.555 | 8.400 | -28.7775     |
| 22  | 7.634 | 7.634 | 7.634 | 7.634 | 7.634 | 7.634 | 7.634 | 7.634 | -17.4358515  |

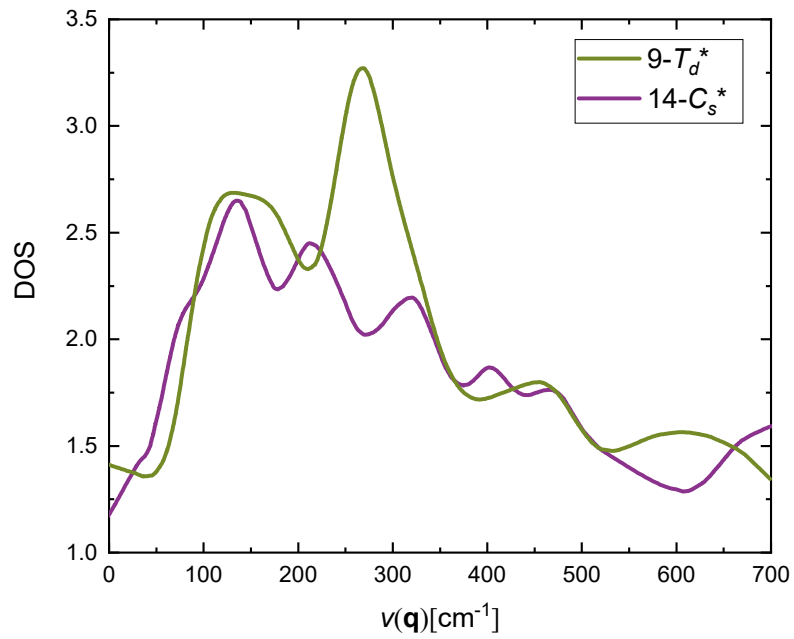

**FigS2.** Density of phonon states of the supercell 14 and 9.

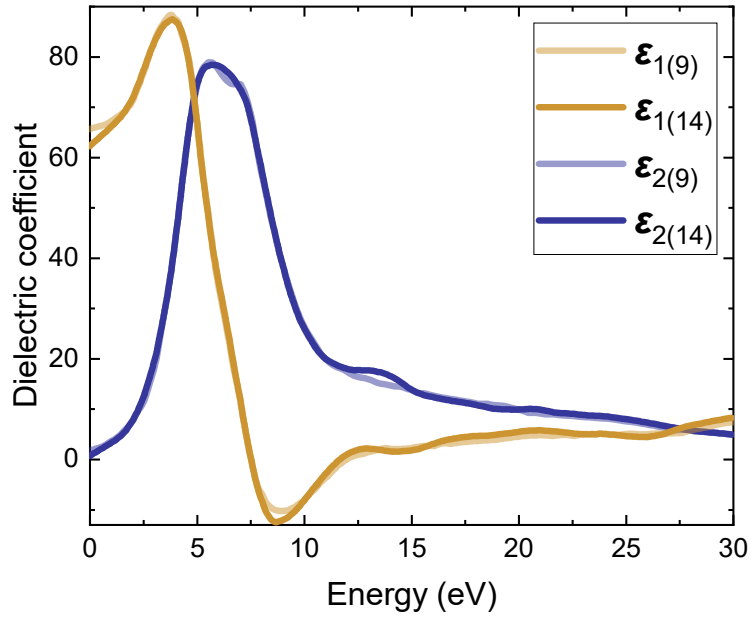

**FigS3.** Real ( $\epsilon_1$ ) and imaginary ( $\epsilon_2$ ) components of the complex dielectric function of the supercell 14 and 9.

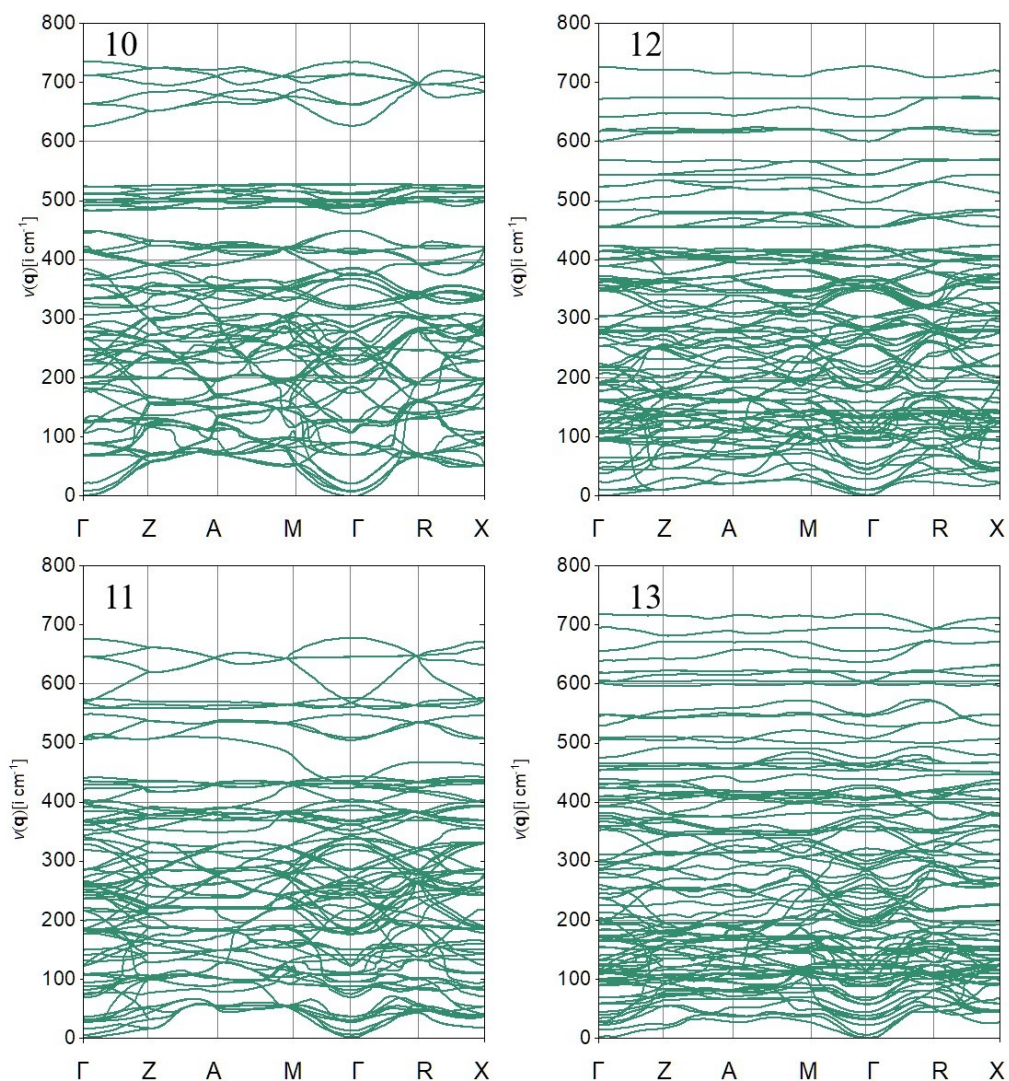

**FigS4.** Phonon scattering spectra of the supercells near MPB. (layered-types: 10, 11; these mixed-types: 12, 13)

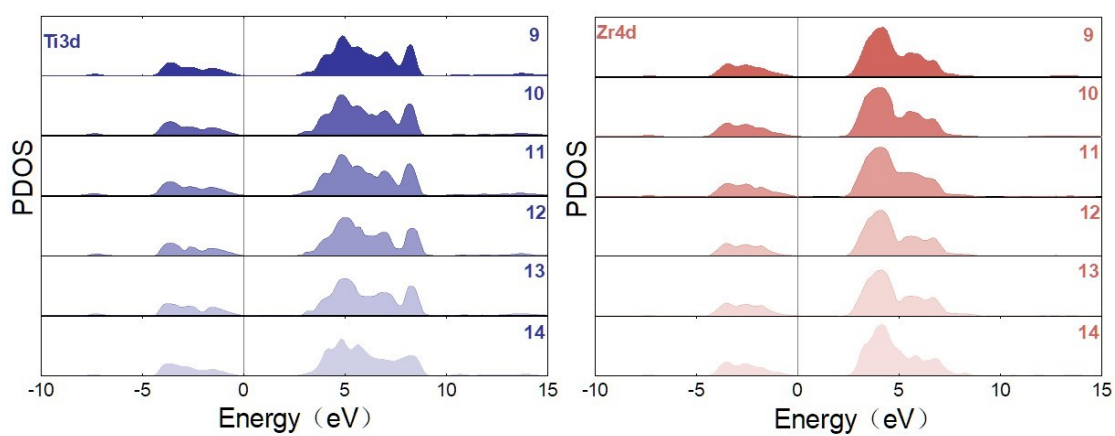

**FigS5.** The Compare of density of states of layered-types and mixed-types.
